# Supplementary material for: Second-Child Fertility Intentions among Urban Women in China: A Systematic Review and Meta-Analysis
Source: MDPI journal article supplement (doi:10.3390/ijerph20043744), 2023-02-20
Supplement: s1 [file s1]

**Table S1 Search strategy**

**Database 1: PubMed**

| Sequence | Query                                                                                                                                                                                                                                                                                                                                                                                                                 |
|----------|-----------------------------------------------------------------------------------------------------------------------------------------------------------------------------------------------------------------------------------------------------------------------------------------------------------------------------------------------------------------------------------------------------------------------|
| #1       | Search: (China[Title/Abstract]) OR (Chinese[Title/Abstract])                                                                                                                                                                                                                                                                                                                                                          |
| #2       | Search: ((fertility desire[Title/Abstract]) OR (fertility intention[Title/Abstract])) OR (willingness to give-birth[Title/Abstract])                                                                                                                                                                                                                                                                                  |
| #3       | Search: ((women[Title/Abstract]) OR (female[Title/Abstract])) OR (childbearing age women[Title/Abstract])                                                                                                                                                                                                                                                                                                             |
| #4       | Search: ("2012/01/01"[Date - Publication] : "2022/03/09"[Date - Publication])                                                                                                                                                                                                                                                                                                                                         |
| #5       | #1AND#2 AND#3 AND#4 AND#5<br>Search: (("2012/01/01"[Date - Publication] : "2022/03/09"[Date - Publication])) AND (((china[Title/Abstract]) OR (Chinese[Title/Abstract])) AND (((fertility desire[Title/Abstract]) OR (fertility intention[Title/Abstract])) OR (willingness to give-birth[Title/Abstract]))) AND (((women[Title/Abstract]) OR (female[Title/Abstract])) OR (childbearing age women[Title/Abstract]))) |

**Database 2: EMBASE**

| Sequence | Query                                                                                        |
|----------|----------------------------------------------------------------------------------------------|
| #1       | China:ab,ti OR Chinese:ab,ti                                                                 |
| #2       | 'fertility desire':ab,ti OR 'fertility intention':ab,ti OR 'willingness to give birth':ab,ti |
| #3       | women:ab,ti OR female:ab,ti OR 'childbearing age women':ab,ti                                |

|    |                  |
|----|------------------|
| #4 | #1 AND #2 AND #3 |
|----|------------------|

#### Database 3: ScienceDirect

| Sequence | Query                                                                                                                                                                        |
|----------|------------------------------------------------------------------------------------------------------------------------------------------------------------------------------|
| #1       | Find articles with these terms:<br>(fertility intention or fertility desire or willingness to give birth)and(women or female or childbearing age women)and(China or Chinese) |
| #2       | Year: 2012-2022                                                                                                                                                              |
| #3       | Article type: review articles and research articles                                                                                                                          |
| #4       | #1 AND #2 AND #3                                                                                                                                                             |

#### Database 4: Web of science

| Sequence | Query                                                                                                                                                                                                    |
|----------|----------------------------------------------------------------------------------------------------------------------------------------------------------------------------------------------------------|
| #1       | TS=(china) OR TS=(Chinese )                                                                                                                                                                              |
| #2       | TS=(fertility desire ) OR TS=(fertility intention) OR TS=(willingness to give-birth)                                                                                                                     |
| #3       | TS=(women) OR TS=(childbearing age women) OR TS=(female)                                                                                                                                                 |
| #4       | Publication Date: All years(1898-2022)                                                                                                                                                                   |
| #5       | #1 AND #2 AND #3 AND #4<br>( TS=(china) OR TS=(Chinese ) ) AND ( TS=(fertility desire ) OR TS=(fertility intention) OR TS=(willingness to reproduce) ) AND ( TS=(women) OR TS=(childbearing age women) ) |

**Database 5: CAJD (CNKI)**

Time range: 2012-01-01---2022-03-09

TKA=('再生育意愿'+生育意愿+'生育意向'+生育计划') AND TKA=('二胎'+二孩+'三胎'+三孩') AND TKA=('妇女'+女性+'女')

**(English) Database 5: CAJD (CNKI)**

Time range: January 1, 2012--- March 9, 2022

TKA=('the intention to fertility again' + 'fertility intention'+ fertility desire'+ fertility plan') AND TKA=('Second child'+ Third child') AND TKA=('women '+female')

**Database 6: CSPD (WANFANG Data)**

((题名或关键词: (二胎) or 题名或关键词: (二孩) or 题名或关键词: (三胎) or 题名或关键词: (三孩) )and (题名或关键词:(再生育意愿) or 题名或关键词:(生育意愿) or 题名或关键词:(生育意向) or 题名或关键词:(生育计划))and (题名或关键词:(女性) or 题名或关键词:(妇女) or 题名或关键词:(女))) and Date:2012-\*

**(English) Database 6: CSPD (WANFANG Data)**

((title or key word: (Second child) or title or key word: (Third child))and (title or key word:( the intention to fertility again) or title or key word:(fertility intention) or title or key word:( fertility desire) or title or key word:( fertility plan))and (title or key word:(female) or title or key word:( women))) and Date:2012-\*

**Database 7: VIP**

**Time range: 2012-2022**

(U=(生育意愿 OR 生育意向 OR 生育计划 OR 再生育意向 )) AND ( U=(女性 OR 妇女 OR 女 )) AND ( U=(二胎 OR 二孩 OR 三胎 OR 三孩 ))

**(English) Database 7: VIP**

**Time range: 2012-2022**

(U=( fertility intention OR fertility desire OR fertility plan OR the intention to fertility again )) AND ( U=( female OR women)) AND ( U=( Second child OR Third child))

Since Database 5-7 is the Chinese database included in the literature search in this paper, the search terms listed in it are in Chinese, so there is no need to translate them into English.

Table S2 The inter-rater reliability for the title abstract screening by the two authors

|           | Title    |          | Abstract |          |
|-----------|----------|----------|----------|----------|
|           | Author 1 | Author 2 | Author 1 | Author 2 |
| Included  | 475      | 428      | 243      | 264      |
| Excluded  | 227      | 236      | 187      | 201      |
| Agreement | 655      |          | 451      |          |
| Sum       | 664      |          | 465      |          |
| Rate      | 98.64%   |          | 96.99%   |          |

Table S3 65 factors related to SFI

| Group                        | Category                         | Exposure                                                                                                                                                                                                                                                                                                                                                                                                                                                                                                                                                                                                |
|------------------------------|----------------------------------|---------------------------------------------------------------------------------------------------------------------------------------------------------------------------------------------------------------------------------------------------------------------------------------------------------------------------------------------------------------------------------------------------------------------------------------------------------------------------------------------------------------------------------------------------------------------------------------------------------|
| A<br><b>Individual level</b> | <b>Demographic factors</b>       | A1-Age, A2-Education, A3-Hukou, A4-Income, A5-Marriage status, A6- Work stability,A7- Hold a management position,A8-Job title,A9- Nationality,A10-Whether comes from only one child family,A11- Physical health, A12-Frequency of participation in community activities,A13- Employed,A14- Work pressure .                                                                                                                                                                                                                                                                                              |
|                              | <b>Fertility attitude</b>        | A15- Ideal childbearing age,A16- Ideal number of children,A17- Gender preference,A18- Age at the first child birthed,A19- Expected sex of first child,A20- Expected sex of two children, A21- The impact of childbirth on women's careers,A22- Facing conflicting choices between career and fertility.                                                                                                                                                                                                                                                                                                 |
| B<br><b>Family level</b>     | <b>Husband factors</b>           | B1-Husband's age, B2- Husband's education, B3- Husband's hukou,B4- The husband has a local hukou,B5- Husband's occupation,B6- Husband's job stability,B7- Husband's income,B8-Whether husband from only one child family ,B9- Fertility attitude of husband,B10- Husband's desired number of children.B11- Household registration type of the couple,B12- Whether the couple comes from only one-child family,B13- Annual household income,B14- Family financial self-assessment,B15- House property,B16- Live together with parents, B17- Who influences fertility intention,B18-Marital satisfaction. |
|                              | <b>Children factors</b>          | B19-Number of children being raised ,B20- Sex of children being raised,B21- Age of first child,B22- Gender of first child,B23-The health condition of first child, B24-The way of children care,B25-The cost of raising children, B26- Babysitting fees,B27-Childcare costs, B28-Husband's time spent on housework and child care,B29-Fertility attitudes of the first child.                                                                                                                                                                                                                           |
|                              | <b>Parents or others factors</b> | B30-Parents support ,B31-To have second child pressure from parents,B32-Parent's fertility attitude,B33-Parents' desired number of children,B34-Whether the first child's gender matches the parents' expectations,B35-In-laws' fertility attitude,B36- In-law relationships. B37-Envy of other people's second child, B38-Friend's fertility attitude.                                                                                                                                                                                                                                                 |

|                              |                       |                                                                                                                                                                                           |
|------------------------------|-----------------------|-------------------------------------------------------------------------------------------------------------------------------------------------------------------------------------------|
| C<br><b>Social<br/>level</b> | <b>Policy factors</b> | C1-The attitude of women's companies, C2-Women's awareness of the universal two-child policy, C3-Women's fertility intention before the implementation of the universal two-child policy. |
|                              | <b>Public service</b> | C4- The perfection of medical and pension insurance in public places, C5- The state of supervision of child care institutions.                                                            |

**Table S4 Distribution of factors in 16 included studies (1 = Yes, 0 = No)**

[illegible]

|            |   |   |   |   |   |   |   |   |   |   |   |   |   |   |   |   |          |
|------------|---|---|---|---|---|---|---|---|---|---|---|---|---|---|---|---|----------|
| <b>B9</b>  | 1 | 0 | 0 | 0 | 0 | 0 | 0 | 0 | 0 | 0 | 0 | 0 | 0 | 0 | 0 | 0 | <b>1</b> |
| <b>B10</b> | 0 | 0 | 0 | 1 | 0 | 0 | 0 | 0 | 0 | 0 | 0 | 0 | 0 | 0 | 0 | 0 | <b>1</b> |
| <b>B11</b> | 0 | 0 | 1 | 0 | 0 | 0 | 0 | 0 | 0 | 0 | 0 | 0 | 0 | 0 | 0 | 0 | <b>1</b> |
| <b>B12</b> | 1 | 1 | 0 | 0 | 0 | 1 | 0 | 0 | 0 | 0 | 0 | 0 | 0 | 0 | 1 | 1 | <b>5</b> |
| <b>B13</b> | 0 | 0 | 1 | 0 | 0 | 1 | 0 | 1 | 1 | 0 | 1 | 0 | 1 | 0 | 1 | 0 | <b>7</b> |
| <b>B14</b> | 0 | 0 | 0 | 1 | 1 | 0 | 0 | 0 | 0 | 1 | 0 | 0 | 0 | 0 | 0 | 0 | <b>3</b> |
| <b>B15</b> | 0 | 0 | 0 | 0 | 1 | 0 | 0 | 0 | 1 | 0 | 0 | 1 | 0 | 0 | 0 | 0 | <b>3</b> |
| <b>B16</b> | 0 | 0 | 0 | 1 | 0 | 0 | 0 | 0 | 1 | 1 | 0 | 0 | 0 | 0 | 0 | 0 | <b>3</b> |
| <b>B17</b> | 0 | 0 | 0 | 0 | 0 | 0 | 0 | 0 | 0 | 0 | 0 | 0 | 0 | 0 | 1 | 0 | <b>1</b> |
| <b>B18</b> | 0 | 0 | 0 | 0 | 0 | 0 | 0 | 0 | 1 | 0 | 0 | 0 | 0 | 0 | 0 | 0 | <b>1</b> |
| <b>B19</b> | 0 | 1 | 0 | 0 | 0 | 0 | 0 | 1 | 1 | 0 | 0 | 1 | 1 | 0 | 1 | 1 | <b>7</b> |
| <b>B20</b> | 0 | 0 | 0 | 0 | 0 | 0 | 0 | 1 | 0 | 0 | 1 | 0 | 1 | 0 | 0 | 0 | <b>3</b> |
| <b>B21</b> | 1 | 0 | 0 | 0 | 0 | 0 | 0 | 1 | 0 | 1 | 0 | 0 | 0 | 0 | 0 | 0 | <b>3</b> |
| <b>B22</b> | 0 | 0 | 1 | 1 | 1 | 0 | 0 | 0 | 1 | 1 | 0 | 0 | 1 | 0 | 0 | 0 | <b>6</b> |
| <b>B23</b> | 0 | 0 | 0 | 0 | 0 | 0 | 0 | 0 | 1 | 0 | 0 | 0 | 0 | 0 | 0 | 0 | <b>1</b> |
| <b>B24</b> | 0 | 0 | 0 | 0 | 0 | 0 | 0 | 0 | 1 | 0 | 0 | 0 | 0 | 0 | 1 | 0 | <b>2</b> |
| <b>B25</b> | 0 | 0 | 0 | 0 | 0 | 0 | 0 | 0 | 0 | 0 | 0 | 1 | 0 | 0 | 1 | 0 | <b>2</b> |
| <b>B26</b> | 0 | 0 | 0 | 0 | 0 | 0 | 0 | 1 | 0 | 0 | 0 | 0 | 0 | 0 | 0 | 0 | <b>1</b> |
| <b>B27</b> | 0 | 0 | 0 | 0 | 0 | 0 | 0 | 1 | 0 | 0 | 0 | 0 | 0 | 0 | 0 | 0 | <b>1</b> |
| <b>B28</b> | 0 | 0 | 0 | 0 | 0 | 0 | 0 | 0 | 0 | 1 | 0 | 0 | 0 | 0 | 0 | 0 | <b>1</b> |
| <b>B29</b> | 1 | 0 | 0 | 0 | 0 | 0 | 0 | 0 | 0 | 0 | 0 | 0 | 0 | 0 | 0 | 0 | <b>1</b> |
| <b>B30</b> | 1 | 0 | 0 | 1 | 0 | 0 | 1 | 0 | 1 | 0 | 0 | 0 | 0 | 0 | 0 | 0 | <b>4</b> |
| <b>B31</b> | 0 | 0 | 0 | 0 | 0 | 0 | 0 | 0 | 1 | 0 | 0 | 0 | 0 | 0 | 0 | 0 | <b>1</b> |
| <b>B32</b> | 1 | 0 | 0 | 0 | 0 | 0 | 0 | 0 | 0 | 0 | 0 | 0 | 0 | 0 | 0 | 0 | <b>1</b> |
| <b>B33</b> | 0 | 0 | 0 | 1 | 0 | 0 | 0 | 0 | 0 | 0 | 0 | 0 | 0 | 0 | 0 | 0 | <b>1</b> |
| <b>B34</b> | 0 | 0 | 0 | 1 | 0 | 0 | 0 | 0 | 0 | 0 | 0 | 0 | 0 | 0 | 0 | 0 | <b>1</b> |
| <b>B35</b> | 1 | 0 | 0 | 0 | 0 | 0 | 0 | 0 | 0 | 0 | 0 | 0 | 0 | 0 | 0 | 0 | <b>1</b> |
| <b>B36</b> | 0 | 0 | 0 | 0 | 0 | 0 | 1 | 0 | 0 | 0 | 0 | 0 | 0 | 0 | 0 | 0 | <b>1</b> |
| <b>B37</b> | 0 | 0 | 0 | 0 | 0 | 0 | 0 | 0 | 1 | 0 | 0 | 0 | 0 | 0 | 0 | 0 | <b>1</b> |
| <b>B38</b> | 1 | 0 | 0 | 0 | 0 | 0 | 0 | 0 | 0 | 0 | 0 | 0 | 0 | 0 | 0 | 0 | <b>1</b> |
| <b>C1</b>  | 0 | 0 | 0 | 0 | 0 | 0 | 0 | 0 | 0 | 0 | 0 | 1 | 0 | 0 | 1 | 0 | <b>2</b> |
| <b>C2</b>  | 0 | 0 | 0 | 0 | 0 | 0 | 0 | 0 | 0 | 0 | 0 | 1 | 0 | 0 | 1 | 0 | <b>2</b> |
| <b>C3</b>  | 0 | 0 | 0 | 0 | 0 | 0 | 0 | 0 | 0 | 0 | 0 | 0 | 0 | 0 | 1 | 0 | <b>1</b> |



|       |    |   |   |    |    |   |   |    |    |   |   |    |    |   |    |   |     |
|-------|----|---|---|----|----|---|---|----|----|---|---|----|----|---|----|---|-----|
| C4    | 0  | 0 | 0 | 0  | 0  | 0 | 0 | 0  | 0  | 0 | 0 | 0  | 0  | 0 | 1  | 0 | 1   |
| C5    | 0  | 0 | 0 | 0  | 0  | 0 | 0 | 0  | 0  | 0 | 0 | 1  | 0  | 0 | 0  | 0 | 1   |
| Total | 12 | 4 | 5 | 15 | 13 | 5 | 5 | 14 | 17 | 8 | 6 | 13 | 10 | 5 | 20 | 6 | 158 |

**Table S5 Data extraction according to each factor**

*\*SFI: Second-child Fertility Intention; Non-SFI: Non Second-child Fertility Intention*

**A1-Age**

| Author     | Group | SFI | Non-SFI | Results                                                 |
|------------|-------|-----|---------|---------------------------------------------------------|
| Yuan,2021  | <=25  | 78  | 46      | Significant difference ( $\chi^2=21.594$ ,<br>P<0.01).  |
|            | 26-30 | 187 | 117     |                                                         |
|            | 31-35 | 189 | 107     |                                                         |
|            | >=36  | 128 | 70      |                                                         |
| Hua,2021   | 20-25 | 10  | 6       | No significant difference ( $\chi^2$ test).             |
|            | 25-30 | 39  | 24      |                                                         |
|            | 30-35 | 17  | 15      |                                                         |
|            | 35-40 | 17  | 9       |                                                         |
|            | 40-45 | 10  | 8       |                                                         |
|            | >=45  | 12  | 5       |                                                         |
| Yuan,2020  | 20-29 | 119 | 201     | Significant difference ( $\chi^2=14.408$ ,<br>P<0.01).  |
|            | 30-39 | 179 | 250     |                                                         |
|            | 40-48 | 9   | 24      |                                                         |
| Ji,2019    | 20-25 | 3   | 44      | Significant difference ( $\chi^2=19.760$ ,<br>P<0.01).  |
|            | 26-30 | 38  | 81      |                                                         |
|            | 31-35 | 28  | 35      |                                                         |
|            | 36-40 | 13  | 23      |                                                         |
|            | >40   | 9   | 26      |                                                         |
| Huang,2019 | 20-30 | 79  | 27      | Significant difference ( $\chi^2=6.770$ ,<br>P<0.01).   |
|            | 31-40 | 38  | 58      |                                                         |
|            | 40-50 | 16  | 50      |                                                         |
| Zhao,2019  | 22-29 | 278 | 134     | No significant difference ( $\chi^2$ test).             |
|            | 30-39 | 308 | 502     |                                                         |
|            | 40-44 | 12  | 212     |                                                         |
| Hui,2019   | <=24  | 22  | 164     | Significant difference ( $\chi^2=71.293$ ,<br>P<0.001). |
|            | 25-29 | 232 | 2599    |                                                         |
|            | 30-34 | 285 | 4534    |                                                         |
|            | 35-39 | 89  | 2279    |                                                         |
|            | >=40  | 9   | 469     |                                                         |
| Liang,2019 | 25-29 | 27  | 37      | Significant difference ( $\chi^2=20.620$ ,<br>P<0.01).  |
|            | 30-34 | 73  | 147     |                                                         |
|            | 35-39 | 54  | 178     |                                                         |
|            | 40-46 | 33  | 160     |                                                         |
| Qin,2018   | 20-29 | 31  | 58      | No significant difference ( $\chi^2$ test).             |
|            | 30-39 | 22  | 85      |                                                         |
|            | 40-49 | 3   | 14      |                                                         |

|                        |       |     |     |                                                         |
|------------------------|-------|-----|-----|---------------------------------------------------------|
| <b>Tao,2021</b>        | <25   | 12  | 8   | Significant difference (P<0.05).                        |
|                        | 25-30 | 578 | 181 |                                                         |
|                        | 31-40 | 165 | 111 |                                                         |
|                        | >40   | 59  | 185 |                                                         |
| <b>Wang<br/>T,2019</b> | <31   | 79  | 23  | Significant difference ( $\chi^2=101.49$ ,<br>P<0.001). |
|                        | 31-35 | 60  | 45  |                                                         |
|                        | >35   | 89  | 234 |                                                         |
| <b>Jin,2018</b>        | 20-24 | 111 | 86  | No                                                      |
|                        | 25-29 | 326 | 279 |                                                         |
|                        | 30-34 | 254 | 386 |                                                         |
|                        | 35-39 | 132 | 473 |                                                         |
|                        | 40-44 | 53  | 468 |                                                         |

## ***A2-Education***

| <b>Author</b>    | <b>Group</b>                                                                                  | <b>SFI</b> | <b>Non-SFI</b> | <b>Results</b>                                          |
|------------------|-----------------------------------------------------------------------------------------------|------------|----------------|---------------------------------------------------------|
| <b>Hua,2021</b>  | Primary school and below                                                                      | 1          | 0              | No significant difference ( $\chi^2$ test).             |
|                  | Junior high school                                                                            | 5          | 3              |                                                         |
|                  | High school                                                                                   | 10         | 12             |                                                         |
|                  | College degree                                                                                | 32         | 21             |                                                         |
|                  | Undergraduate degree                                                                          | 52         | 25             |                                                         |
|                  | Master degree and above                                                                       | 5          | 6              |                                                         |
| <b>Fan,2021</b>  | Junior high school and below                                                                  | 12         | 21             | No significant difference ( $\chi^2$ test).             |
|                  | high school or secondary school                                                               | 25         | 41             |                                                         |
|                  | College degree                                                                                | 46         | 70             |                                                         |
|                  | Undergraduate degree                                                                          | 80         | 138            |                                                         |
|                  | Master degree and above                                                                       | 26         | 49             |                                                         |
| <b>Yuan,2020</b> | Junior high school and below                                                                  | 62         | 73             | Significant difference ( $\chi^2=36.856$ ,<br>P<0.001). |
|                  | high school or secondary school                                                               | 54         | 149            |                                                         |
|                  | College degree or Higher<br>vocational education                                              | 69         | 136            |                                                         |
|                  | Undergraduate degree                                                                          | 108        | 106            |                                                         |
|                  | Master degree or Doctor's Degree                                                              | 14         | 11             |                                                         |
| <b>Ji,2019</b>   | Junior high school and below                                                                  | 5          | 7              | No significant difference ( $\chi^2$ test).             |
|                  | High school or technical secondary<br>school or vocational high school or<br>technical school | 19         | 34             |                                                         |
|                  | College degree                                                                                | 28         | 67             |                                                         |
|                  | Undergraduate degree                                                                          | 33         | 81             |                                                         |
|                  | Master degree and above                                                                       | 6          | 20             |                                                         |
|                  |                                                                                               |            |                |                                                         |

|                   |                                                               |     |      |                                                         |
|-------------------|---------------------------------------------------------------|-----|------|---------------------------------------------------------|
| <b>Huang,2019</b> | primary school                                                | 7   | 3    | Significant difference ( $\chi^2=3.004$ ,<br>P<0.01).   |
|                   | junior high school                                            | 10  | 8    |                                                         |
|                   | High school or technical secondary school or technical school | 53  | 35   |                                                         |
|                   | College degree and above                                      | 63  | 89   |                                                         |
|                   |                                                               |     |      |                                                         |
| <b>Zhao,2019</b>  | High school and below                                         | 254 | 486  | Significant difference ( $\chi^2=10.71$ ,<br>P<0.01).   |
|                   | College and above                                             | 342 | 364  |                                                         |
| <b>Lin,2019</b>   | Elementary school and below                                   | 10  | 1    | No significant difference ( $\chi^2$ test).             |
|                   | junior high school                                            | 50  | 20   |                                                         |
|                   | high school or secondary school                               | 46  | 20   |                                                         |
|                   | College degree or Undergraduate degree                        | 103 | 49   |                                                         |
|                   | Master degree and above                                       | 6   | 6    |                                                         |
| <b>Hui,2019</b>   | Elementary school and below                                   | 4   | 55   | Significant difference ( $\chi^2=40.519$ ,<br>P<0.001). |
|                   | junior high school                                            | 28  | 616  |                                                         |
|                   | high school or secondary school                               | 50  | 1288 |                                                         |
|                   | College degree                                                | 173 | 2814 |                                                         |
|                   | Undergraduate degree                                          | 296 | 4514 |                                                         |
|                   | Master degree and above                                       | 86  | 773  |                                                         |
| <b>Liang,2019</b> | High school or technical secondary school and below           | 17  | 36   | No significant difference ( $\chi^2$ test).             |
|                   | College degree                                                | 35  | 124  |                                                         |
|                   | Undergraduate degree                                          | 113 | 323  |                                                         |
|                   | Master degree and above                                       | 22  | 39   |                                                         |
| <b>Qin,2018</b>   | Junior high school and below                                  | 13  | 33   | Significant difference ( $\chi^2=7.512$ ,<br>P<0.05).   |
|                   | high school or college degree                                 | 19  | 84   |                                                         |
|                   | Undergraduate degree and above                                | 24  | 40   |                                                         |
| <b>Tao,2021</b>   | Junior high school and below                                  | 301 | 250  | Significant difference (P<0.05).                        |
|                   | high school or secondary school or College degree             | 325 | 163  |                                                         |
|                   | Undergraduate degree and above                                | 188 | 72   |                                                         |
| <b>Jin,2018</b>   | Junior high school and below                                  | 261 | 652  | No                                                      |
|                   | high school                                                   | 340 | 627  |                                                         |
|                   | College degree                                                | 181 | 291  |                                                         |
|                   | Undergraduate degree and above                                | 95  | 122  |                                                         |

### ***A3-Hukou***

| <b>Author</b>   | <b>Group</b>    | <b>SFI</b> | <b>Non-SFI</b> | <b>Results</b>                              |
|-----------------|-----------------|------------|----------------|---------------------------------------------|
| <b>Hua,2021</b> | Non-rural Rural | 66         | 35             | No significant difference ( $\chi^2$ test). |
|                 |                 | 39         | 32             |                                             |

|                        |           |     |     |                                                        |
|------------------------|-----------|-----|-----|--------------------------------------------------------|
| <b>Wang<br/>T,2019</b> | Rural     | 39  | 24  | Significant difference ( $\chi^2=17.59$ ,<br>P<0.001). |
|                        | Non-rural | 189 | 278 |                                                        |
| <b>Jin,2018</b>        | Rural     | 360 | 487 | No                                                     |
|                        | Urban     | 199 | 578 |                                                        |
|                        | resident  | 317 | 627 |                                                        |

#### *A4-Income*

| Author           | Group       | SFI | Non-SFI | Results                                                 |
|------------------|-------------|-----|---------|---------------------------------------------------------|
| <b>Yuan,2021</b> | <=2000      | 112 | 80      | No significant difference ( $\chi^2$ test).             |
|                  | 2001-4000   | 189 | 102     |                                                         |
|                  | 4001-6000   | 136 | 71      |                                                         |
|                  | 6001-8000   | 78  | 49      |                                                         |
|                  | >=8001      | 68  | 38      |                                                         |
| <b>Fan,2021</b>  | <=2000      | 25  | 38      | No significant difference ( $\chi^2$ test).             |
|                  | 2001-4000   | 12  | 21      |                                                         |
|                  | 4001-6000   | 25  | 41      |                                                         |
|                  | 6001-8000   | 46  | 70      |                                                         |
|                  | 8000-10000  | 80  | 138     |                                                         |
|                  | >=10000     | 26  | 49      |                                                         |
| <b>Ji,2019</b>   | <3000       | 8   | 61      | Significant difference ( $\chi^2=14.989$ ,<br>P<0.01).  |
|                  | 3000-5999   | 43  | 105     |                                                         |
|                  | 6000-9999   | 25  | 27      |                                                         |
|                  | 10000-20000 | 11  | 11      |                                                         |
|                  | >20000      | 4   | 5       |                                                         |
| <b>Hui,2019</b>  | <4000       | 63  | 1219    | Significant difference ( $\chi^2=24.320$ ,<br>P<0.001). |
|                  | 4000-8000   | 166 | 3258    |                                                         |
|                  | 8001-12500  | 138 | 2233    |                                                         |
|                  | >12500      | 125 | 1391    |                                                         |

#### *A5-Marriage status*

| Author           | Group               | SFI | Non-SFI | Results                                                  |
|------------------|---------------------|-----|---------|----------------------------------------------------------|
| <b>Yuan,2021</b> | Unmarried           | 261 | 24      | Significant difference ( $\chi^2=171.249$ ,<br>P<0.001). |
|                  | Married             | 322 | 316     |                                                          |
| <b>Yuan,2020</b> | Unmarried           | 11  | 15      | No significant difference ( $\chi^2$ test).              |
|                  | Married             | 296 | 460     |                                                          |
| <b>Ji,2019</b>   | Unmarried           | 8   | 68      | Significant difference ( $\chi^2=19.194$ ,<br>P<0.001).  |
|                  | First marriage      | 80  | 135     |                                                          |
|                  | Remarried           | 2   | 3       |                                                          |
|                  | divorced or widowed | 1   | 3       |                                                          |

#### *A6- Work stability*

| Author | Group | SFI | Non-SFI | Results |
|--------|-------|-----|---------|---------|
|--------|-------|-----|---------|---------|

|                   |                                                  |     |      |                                                        |
|-------------------|--------------------------------------------------|-----|------|--------------------------------------------------------|
| <b>Hua,2021</b>   | Government Department or Public Institution      | 23  | 7    | Significant difference ( $\chi^2=24.855$ , $P<0.01$ ). |
|                   | State-owned enterprise or Collective enterprises | 30  | 18   |                                                        |
|                   | private enterprise                               | 45  | 22   |                                                        |
|                   | Freelancers                                      | 7   | 20   |                                                        |
|                   |                                                  |     |      |                                                        |
| <b>Fan,2021</b>   | Government Department                            | 9   | 14   | No significant difference ( $\chi^2$ test).            |
|                   | Public Institution                               | 87  | 123  |                                                        |
|                   | State-owned enterprise                           | 6   | 25   |                                                        |
|                   | Private enterprise                               | 47  | 86   |                                                        |
|                   | Others                                           | 40  | 71   |                                                        |
| <b>Yuan,2020</b>  | Government Department                            | 6   | 6    | No significant difference ( $\chi^2$ test).            |
|                   | Public Institution                               | 45  | 45   |                                                        |
|                   | Enterprise                                       | 104 | 164  |                                                        |
|                   | Individually-owned business                      | 66  | 107  |                                                        |
|                   | Freelancers                                      | 43  | 77   |                                                        |
|                   | Unemployed                                       | 9   | 28   |                                                        |
|                   | Others                                           | 34  | 48   |                                                        |
| <b>Ji,2019</b>    | Current students                                 | 0   | 9    | Significant difference ( $\chi^2=20.824$ , $P<0.01$ ). |
|                   | State-owned enterprise                           | 7   | 28   |                                                        |
|                   | Private Enterprise                               | 26  | 29   |                                                        |
|                   | Foreign company or joint venture                 | 1   | 9    |                                                        |
|                   | Government Department or Public Institution      | 20  | 74   |                                                        |
|                   | Individually-owned business                      | 7   | 19   |                                                        |
|                   | Freelancers                                      | 9   | 15   |                                                        |
|                   | Housewife                                        | 12  | 4    |                                                        |
|                   | Others                                           | 9   | 22   |                                                        |
| <b>Huang,2019</b> | Government Department                            | 59  | 56   | No significant difference ( $\chi^2$ test).            |
|                   | Public Institution                               |     |      |                                                        |
|                   | Enterprise                                       | 40  | 40   |                                                        |
|                   | Service industry                                 | 34  | 39   |                                                        |
| <b>Lin,2019</b>   | Government Department                            | 47  | 29   | No significant difference ( $\chi^2$ test).            |
|                   | Freelancers                                      | 68  | 36   |                                                        |
|                   | Private Enterprise                               | 46  | 18   |                                                        |
|                   | Housewife                                        | 54  | 13   |                                                        |
| <b>Qin,2018</b>   | Unemployed                                       | 15  | 60   | No significant difference ( $\chi^2$ test).            |
|                   | Employed                                         | 33  | 74   |                                                        |
|                   | Self-employed                                    | 8   | 23   |                                                        |
| <b>Hui,2019</b>   | Housewife                                        | 142 | 1835 | Significant difference ( $\chi^2=6.633$ , $P<0.05$ ).  |
|                   | Others                                           | 497 | 8274 |                                                        |

***A7-Hold a management position***

| Author   | Group               | SFI | Non-SFI | Results                                     |
|----------|---------------------|-----|---------|---------------------------------------------|
| Hua,2021 | Top management      | 4   | 6       | No significant difference ( $\chi^2$ test). |
|          | Middle managers     | 11  | 5       |                                             |
|          | Grassroots managers | 20  | 17      |                                             |
|          | General staff       | 70  | 39      |                                             |

***A8-Job title***

| Author    | Group               | SFI | Non-SFI | Results                                     |
|-----------|---------------------|-----|---------|---------------------------------------------|
| Yuan,2020 | Senior title        | 0   | 5       | No significant difference ( $\chi^2$ test). |
|           | Deputy senior title | 4   | 5       |                                             |
|           | Intermediate title  | 41  | 61      |                                             |
|           | Division title      | 53  | 67      |                                             |
|           | No title            | 209 | 337     |                                             |

***A9-Nationality***

| Author     | Group           | SFI | Non-SFI | Results                                     |
|------------|-----------------|-----|---------|---------------------------------------------|
| Huang,2019 | Han nationality | 123 | 129     | No significant difference ( $\chi^2$ test). |
|            | Others          | 10  | 6       |                                             |

***A10-Whether comes from only one child family***

| Author   | Group | SFI | Non-SFI | Results                                               |
|----------|-------|-----|---------|-------------------------------------------------------|
| Jin,2018 | Yes   | 516 | 1154    | No                                                    |
|          | No    | 361 | 540     |                                                       |
| Lin,2019 | Yes   | 17  | 19      | Significant difference ( $\chi^2=9.158$ ,<br>P<0.01). |
|          | No    | 198 | 77      |                                                       |

***A11- Physical health***

| Author   | Group       | SFI | Non-SFI | Results                                                |
|----------|-------------|-----|---------|--------------------------------------------------------|
| Fan,2021 | Very good   | 59  | 64      | Significant difference ( $\chi^2=10.851$ ,<br>P<0.05). |
|          | Good        | 94  | 164     |                                                        |
|          | Not too bad | 30  | 73      |                                                        |
|          | Bad         | 6   | 17      |                                                        |
|          | Very bad    | 0   | 1       |                                                        |
| Lin,2019 | Very good   | 182 | 71      | No significant difference ( $\chi^2$ test).            |
|          | Good        | 29  | 24      |                                                        |
|          | Bad         | 3   | 2       |                                                        |
|          | Very bad    | 1   | 0       |                                                        |

***A12- Frequency of participation in community activities***

| Author | Group | SFI | Non-SFI | Results |
|--------|-------|-----|---------|---------|
|--------|-------|-----|---------|---------|

|           |                        |     |     |                                                        |
|-----------|------------------------|-----|-----|--------------------------------------------------------|
| Zhao,2019 | Once a month or none   | 233 | 261 | Significant difference ( $\chi^2=22.78$ ,<br>P<0.001). |
|           | At least twice a month | 363 | 589 |                                                        |

#### *A13- Employed*

| Author   | Group | SFI | Non-SFI | Results |
|----------|-------|-----|---------|---------|
| Jin,2018 | Yes   | 753 | 1538    | No      |
|          | No    | 125 | 156     |         |

#### *A14- Work pressure*

| Author  | Group       | SFI | Non-SFI | Results                                                 |
|---------|-------------|-----|---------|---------------------------------------------------------|
| Li,2017 | Very high   | 11  | 36      | Significant difference ( $\chi^2=3.177^a$ ,<br>P<0.01). |
|         | High        | 43  | 94      |                                                         |
|         | Not too bad | 70  | 102     |                                                         |
|         | Low         | 16  | 15      |                                                         |
|         | Very low    | 30  | 32      |                                                         |

#### *A15- Ideal childbearing age*

| Author   | Group | SFI | Non-SFI | Results                                                |
|----------|-------|-----|---------|--------------------------------------------------------|
| Lin,2019 | <20   | 0   | 1       | Significant difference ( $\chi^2=12.584$ ,<br>P<0.01). |
|          | 20-25 | 86  | 38      |                                                        |
|          | 26-30 | 128 | 51      |                                                        |
|          | >30   | 1   | 6       |                                                        |

#### *A16-Ideal number of children*

| Author    | Group | SFI | Non-SFI | Results                                                  |
|-----------|-------|-----|---------|----------------------------------------------------------|
| Yuan,2021 | 0     | 0   | 11      | Significant difference ( $\chi^2=617.158$ ,<br>P<0.001). |
|           | 1     | 152 | 327     |                                                          |
|           | 2     | 429 | 2       |                                                          |
|           | 3     | 2   | 0       |                                                          |
| Ji,2019   | 0     | 0   | 8       | Significant difference ( $\chi^2=54.909$ ,<br>P<0.001).  |
|           | 1     | 3   | 88      |                                                          |
|           | >=2   | 88  | 22      |                                                          |
| Qin,2018  | 1     | 5   | 113     | Significant difference ( $\chi^2=66.401$ ,<br>P<0.001).  |
|           | >=2   | 51  | 44      |                                                          |
| Jin,2018  | <=1   | 109 | 900     | No                                                       |
|           | >=2   | 767 | 794     |                                                          |

#### *A17- Gender preference*

| Author   | Group        | SFI | Non-SFI | Results                                                 |
|----------|--------------|-----|---------|---------------------------------------------------------|
| Hua,2021 | A girl       | 2   | 29      | Significant difference ( $\chi^2=27.058$ ,<br>P<0.001). |
|          | A boy        | 1   | 23      |                                                         |
|          | Boy and Girl | 55  | 87      |                                                         |
|          | Two girls    | 6   | 3       |                                                         |



|            |              |     |     |                                                         |
|------------|--------------|-----|-----|---------------------------------------------------------|
|            | Two boys     | 1   | 1   |                                                         |
|            | No idea      | 26  | 66  |                                                         |
| Lin,2019   | A girl       | 5   | 8   | Significant difference ( $\chi^2=26.977$ ,<br>P<0.001). |
|            | A boy        | 4   | 11  |                                                         |
|            | Boy and Girl | 191 | 69  |                                                         |
|            | Two girls    | 1   | 4   |                                                         |
|            | Two boys     | 7   | 2   |                                                         |
|            | Others       | 7   | 2   |                                                         |
| Liang,2019 | A girl       | 14  | 49  | Significant difference ( $\chi^2=51.842$ ,<br>P<0.001). |
|            | A boy        | 26  | 120 |                                                         |
|            | Boy and Girl | 118 | 192 |                                                         |
|            | No idea      | 29  | 161 |                                                         |
| Bai,2018   | Boy          | 43  | 33  | Significant difference (P<0.05).                        |
|            | Girl         | 71  | 101 |                                                         |
|            | No idea      | 343 | 257 |                                                         |

#### *A18-Age at the first child birthed*

| Author    | Group | SFI | Non-SFI | Results                                                |
|-----------|-------|-----|---------|--------------------------------------------------------|
| Yuan,2020 | <=30  | 192 | 259     | Significant difference ( $\chi^2=15.427$ ,<br>P<0.01). |
|           | >30   | 30  | 84      |                                                        |

#### *A19- Expected sex of first baby*

| Author   | Group   | SFI | Non-SFI | Results                                     |
|----------|---------|-----|---------|---------------------------------------------|
| Hua,2021 | Boy     | 32  | 22      | No significant difference ( $\chi^2$ test). |
|          | Girl    | 44  | 30      |                                             |
|          | No idea | 39  | 15      |                                             |

#### *A20- Expected sex of two babies*

| Author   | Group        | SFI | Non-SFI | Results                                     |
|----------|--------------|-----|---------|---------------------------------------------|
| Hua,2021 | Two girls    | 23  | 17      | No significant difference ( $\chi^2$ test). |
|          | Two boys     | 43  | 19      |                                             |
|          | Boy and Girl | 39  | 31      |                                             |

#### *A21- The impact of fertility on women's career development*

| Author   | Group                                   | SFI | Non-SFI | Results                                     |
|----------|-----------------------------------------|-----|---------|---------------------------------------------|
| Hua,2021 | No effect                               | 29  | 19      | No significant difference ( $\chi^2$ test). |
|          | Influence career choices                | 43  | 24      |                                             |
|          | Influence promotion and salary increase | 33  | 24      |                                             |
|          |                                         |     |         |                                             |

|          |             |    |     |                                                         |
|----------|-------------|----|-----|---------------------------------------------------------|
| Fan,2021 | Very high   | 9  | 47  | Significant difference ( $\chi^2=24.472$ ,<br>P<0.001). |
|          | High        | 29 | 40  |                                                         |
|          | Not too bad | 53 | 123 |                                                         |
|          | Low         | 77 | 83  |                                                         |
|          | Very low    | 21 | 26  |                                                         |

### ***A22-Facing conflicting choices between career and fertility***

| Author   | Group                         | SFI | Non-SFI | Results                                                 |
|----------|-------------------------------|-----|---------|---------------------------------------------------------|
| Hua,2021 | Choose children               | 50  | 30      | Significant difference ( $\chi^2=37.718$ ,<br>P<0.001). |
|          | Choose career                 | 30  | 15      |                                                         |
|          | Balancing children and career | 25  | 22      |                                                         |
| Ji,2019  | Choose children               | 22  | 21      | Significant difference ( $\chi^2=27.392$ ,<br>P<0.001). |
|          | Choose career                 | 12  | 81      |                                                         |
|          | Balancing children and career | 56  | 97      |                                                         |
|          | Others                        | 1   | 10      |                                                         |

### ***B1- Husband's age***

| Author      | Group | SFI | Non-SFI | Results                                                |
|-------------|-------|-----|---------|--------------------------------------------------------|
| Qin,2018    | 20-29 | 20  | 32      | No significant difference ( $\chi^2$ test).            |
|             | 30-39 | 29  | 102     |                                                        |
|             | 40-49 | 7   | 21      |                                                        |
| Wang T,2019 | <31   | 46  | 16      | Significant difference ( $\chi^2=74.66$ ,<br>P<0.001). |
|             | 31-35 | 54  | 23      |                                                        |
|             | >35   | 128 | 263     |                                                        |

### ***B2- Husband's education***

| Author   | Group                                        | SFI | Non-SFI | Results                                                 |
|----------|----------------------------------------------|-----|---------|---------------------------------------------------------|
| Hui,2019 | Less than primary school                     | 1   | 24      | Significant difference ( $\chi^2=35.842$ ,<br>P<0.001). |
|          | Junior high school                           | 28  | 461     |                                                         |
|          | High school or technical<br>secondary school | 66  | 1400    |                                                         |
|          | Junior college                               | 164 | 2828    |                                                         |
|          | Bachelor degree                              | 259 | 4177    |                                                         |
|          | Master and above                             | 116 | 1090    |                                                         |
| Qin,2018 | Junior high school and below                 | 10  | 30      | No significant difference ( $\chi^2$ test).             |
|          | High school or college degree                | 19  | 79      |                                                         |
|          | Bachelor and above                           | 27  | 48      |                                                         |
| Bai,2018 | High school and below                        | 74  | 82      | Significant difference (P<0.01).                        |
|          | College degree or bachelor degree            | 258 | 236     |                                                         |
|          | Master and above                             | 85  | 42      |                                                         |

|                    |                                  |     |     |                                                       |
|--------------------|----------------------------------|-----|-----|-------------------------------------------------------|
| <b>Wang T,2019</b> | Less than high school            | 30  | 73  | Significant difference ( $\chi^2=13.27$ ,<br>P<0.01). |
|                    | Junior college or college degree | 187 | 215 |                                                       |
|                    | Hight than bachelor's degree     | 11  | 14  |                                                       |
| <b>Jin,2018</b>    | Junior high school and below     | 202 | 550 | No                                                    |
|                    | High school                      | 322 | 613 |                                                       |
|                    | College degree                   | 225 | 363 |                                                       |
|                    | Bachelor and above               | 128 | 167 |                                                       |

### ***B3- Husband's hukou***

| <b>Author</b>  | <b>Group</b> | <b>SFI</b> | <b>Non-SFI</b> | <b>Results</b>                                        |
|----------------|--------------|------------|----------------|-------------------------------------------------------|
| <b>Li,2017</b> | Rural        | 55         | 63             | Significant difference ( $\chi^2=4.613$ ,<br>P<0.05). |
|                | Non-rural    | 115        | 210            |                                                       |

### ***B4- The husband is a local***

| <b>Author</b>   | <b>Group</b> | <b>SFI</b> | <b>Non-SFI</b> | <b>Results</b>                                          |
|-----------------|--------------|------------|----------------|---------------------------------------------------------|
| <b>Hui,2019</b> | Yes          | 393        | 7467           | Significant difference ( $\chi^2=53.197$ ,<br>P<0.001). |
|                 | No           | 246        | 2544           |                                                         |
| <b>Li,2017</b>  | Yes          | 102        | 200            | Significant difference ( $\chi^2=8.489$ ,<br>P<0.01).   |
|                 | No           | 68         | 73             |                                                         |
| <b>Qin,2018</b> | Yes          | 43         | 126            | No significant difference ( $\chi^2$ test).             |
|                 | No           | 13         | 31             |                                                         |

### ***B5- Husband's occupation***

| <b>Author</b>   | <b>Group</b>                                                   | <b>SFI</b> | <b>Non-SFI</b> | <b>Results</b>                              |
|-----------------|----------------------------------------------------------------|------------|----------------|---------------------------------------------|
| <b>Hui,2019</b> | Heads of government department<br>or public institution        | 55         | 706            | No significant difference ( $\chi^2$ test). |
|                 | Professional skill worker                                      | 225        | 3521           |                                             |
|                 | Civil servant or clerk                                         | 65         | 1090           |                                             |
|                 | business or service workers                                    | 137        | 2421           |                                             |
|                 | Agriculture, forestry, animal<br>husbandry and fishery workers | 2          | 25             |                                             |
|                 | Production transport operator                                  | 39         | 704            |                                             |
|                 | Freelancers                                                    | 71         | 950            |                                             |
|                 | Others                                                         | 34         | 439            |                                             |
| <b>Qin,2018</b> | Employed                                                       | 36         | 95             | No significant difference ( $\chi^2$ test). |
|                 | Self employed                                                  | 18         | 53             |                                             |
|                 | Unemployed                                                     | 2          | 9              |                                             |

### ***B6- Husband's job stability***

| <b>Author</b> | <b>Group</b> | <b>SFI</b> | <b>Non-SFI</b> | <b>Results</b> |
|---------------|--------------|------------|----------------|----------------|
|---------------|--------------|------------|----------------|----------------|

|          |                                                  |     |      |                                             |
|----------|--------------------------------------------------|-----|------|---------------------------------------------|
| Hui,2019 | Government Department or Public Institution      | 85  | 1111 | No significant difference ( $\chi^2$ test). |
|          | State-owned enterprise or Collective enterprises | 124 | 2069 |                                             |
|          | Private enterprise                               | 221 | 3500 |                                             |
|          | Foreign company or joint venture                 | 114 | 1989 |                                             |
|          | Individually-owned business                      | 58  | 660  |                                             |
|          | Army                                             | 4   | 39   |                                             |
|          | Others                                           | 12  | 201  |                                             |
|          | Freelancers                                      | 12  | 246  |                                             |

#### ***B7- Husband's income***

| Author   | Group     | SFI | Non-SFI | Results                                                |
|----------|-----------|-----|---------|--------------------------------------------------------|
| Qin,2018 | <5000     | 11  | 64      | Significant difference ( $\chi^2=12.641$ ,<br>P<0.01). |
|          | 5000-6999 | 16  | 50      |                                                        |
|          | >=7000    | 29  | 43      |                                                        |

#### ***B8- Whether husband from only one child family***

| Author   | Group | SFI | Non-SFI | Results                                     |
|----------|-------|-----|---------|---------------------------------------------|
| Qin,2018 | Yes   | 16  | 49      | No significant difference ( $\chi^2$ test). |
|          | No    | 40  | 108     |                                             |
| Jin,2018 | Yes   | 254 | 380     | No                                          |
|          | No    | 481 | 1102    |                                             |

#### ***B9- Fertility attitude of husband***

| Author      | Group       | SFI | Non-SFI | Results                                                 |
|-------------|-------------|-----|---------|---------------------------------------------------------|
| Wang T,2019 | Support     | 169 | 52      | Significant difference ( $\chi^2=175.77$ ,<br>P<0.001). |
|             | Non-support | 15  | 114     |                                                         |
|             | No idea     | 40  | 104     |                                                         |

#### ***B10- Husband 's desired number of children***

| Author   | Group | SFI | Non-SFI | Results |
|----------|-------|-----|---------|---------|
| Jin,2018 | <=1   | 105 | 889     | No      |
|          | >1    | 772 | 804     |         |

#### ***B11- Household registration type of the couple***

| Author   | Group                   | SFI | Non-SFI | Results                          |
|----------|-------------------------|-----|---------|----------------------------------|
| Tao,2021 | Rural residents         | 722 | 406     | Significant difference (P<0.05). |
|          | One rural and one urban | 70  | 45      |                                  |
|          | Urban residents         | 22  | 34      |                                  |

#### ***B12- Whether the couple comes from only one-child family***

| Author | Group | SFI | Non-SFI | Results |
|--------|-------|-----|---------|---------|
|--------|-------|-----|---------|---------|

|                    |                                              |     |     |                                                         |
|--------------------|----------------------------------------------|-----|-----|---------------------------------------------------------|
| <b>Yuan,2021</b>   | One among the couple was the only child      | 285 | 130 | Significant difference ( $\chi^2=33.471$ , $P<0.001$ ). |
|                    | Both members of a couple were the only child | 71  | 86  |                                                         |
|                    | Others                                       | 227 | 124 |                                                         |
| <b>Hua,2021</b>    | Wife was the only child                      | 33  | 17  | Significant difference ( $\chi^2=31.501$ , $P<0.001$ ). |
|                    | The husband was the only child               | 17  | 15  |                                                         |
|                    | Both members of a couple were the only child | 24  | 21  |                                                         |
|                    | Others                                       | 31  | 14  |                                                         |
| <b>Liang,2019</b>  | One among the couple was the only child      | 50  | 137 | Significant difference ( $\chi^2=19.570$ , $P<0.001$ ). |
|                    | Both members of a couple were the only child | 111 | 233 |                                                         |
|                    | Others                                       | 26  | 152 |                                                         |
| <b>Bai,2018</b>    | One among the couple was the only child      | 129 | 110 | Significant difference ( $P<0.01$ ).                    |
|                    | Both members of a couple were the only child | 152 | 165 |                                                         |
|                    | Others                                       | 136 | 85  |                                                         |
| <b>Wang T,2019</b> | One among the couple was the only child      | 57  | 45  | Significant difference ( $\chi^2=20.85$ , $P<0.001$ ).  |
|                    | Both members of a couple were the only child | 21  | 13  |                                                         |
|                    | Others                                       | 150 | 244 |                                                         |

### ***B13- Annual household income***

| <b>Author</b>     | <b>Group</b>  | <b>SFI</b> | <b>Non-SFI</b> | <b>Results</b>                                          |
|-------------------|---------------|------------|----------------|---------------------------------------------------------|
| <b>Yuan,2020</b>  | <50000        | 34         | 99             | Significant difference ( $\chi^2=62.474$ , $P<0.001$ ). |
|                   | 50000-100000  | 83         | 191            |                                                         |
|                   | 100000-150000 | 78         | 105            |                                                         |
|                   | 150000-200000 | 52         | 49             |                                                         |
|                   | $\geq 200000$ | 60         | 31             |                                                         |
| <b>Liang,2019</b> | <100000       | 29         | 81             | Significant difference ( $\chi^2=16.736$ , $P<0.05$ ).  |
|                   | 100000-190000 | 62         | 226            |                                                         |
|                   | 200000-290000 | 49         | 125            |                                                         |
|                   | 300000-490000 | 32         | 68             |                                                         |
|                   | $\geq 500000$ | 15         | 22             |                                                         |
| <b>Hui,2019</b>   | <100000       | 86         | 1437           | Significant difference ( $\chi^2=46.035$ , $P<0.001$ ). |
|                   | 100000-200000 | 161        | 3463           |                                                         |
|                   | 200000-300000 | 151        | 2505           |                                                         |
|                   | $\geq 300000$ | 225        | 2421           |                                                         |

***B14-Family financial self-assessment***

| Author    | Group    | SFI | Non-SFI | Results                                     |
|-----------|----------|-----|---------|---------------------------------------------|
| Qin,2018  | Low      | 15  | 62      | No significant difference ( $\chi^2$ test). |
|           | Medium   | 26  | 54      |                                             |
|           | High     | 15  | 41      |                                             |
| Zhao,2019 | Low      | 270 | 360     | No significant difference ( $\chi^2$ test). |
|           | Medium   | 264 | 362     |                                             |
|           | High     | 62  | 128     |                                             |
| Jin,2018  | 0-25%    | 211 | 426     | No                                          |
|           | 25%-50%  | 167 | 494     |                                             |
|           | 50%-75%  | 213 | 440     |                                             |
|           | 75%-100% | 286 | 334     |                                             |

***B15- House property***

| Author   | Group                    | SFI | Non-SFI | Results                                     |
|----------|--------------------------|-----|---------|---------------------------------------------|
| Ji,2019  | Own house                | 84  | 174     | No significant difference ( $\chi^2$ test). |
|          | Rent                     | 2   | 24      |                                             |
|          | Affordable housing       | 1   | 0       |                                             |
|          | Company provides housing | 1   | 4       |                                             |
|          | Others                   | 3   | 7       |                                             |
| Lin,2019 | Parents' house           | 90  | 35      | No significant difference ( $\chi^2$ test). |
|          | House owned by loan      | 57  | 31      |                                             |
|          | Own house                | 49  | 23      |                                             |
|          | Others                   | 19  | 7       |                                             |
| Qin,2018 | Own house                | 25  | 68      | No significant difference ( $\chi^2$ test). |
|          | Others                   | 31  | 89      |                                             |

***B16- Live together with parents***

| Author    | Group             | SFI | Non-SFI | Results                                                 |
|-----------|-------------------|-----|---------|---------------------------------------------------------|
| Jin,2018  | No                | 614 | 1271    | No                                                      |
|           | live with parents | 65  | 103     |                                                         |
|           | live with in-laws | 195 | 319     |                                                         |
| Zhao,2019 | No                | 394 | 442     | No significant difference ( $\chi^2$ test).             |
|           | live with parents | 89  | 249     |                                                         |
|           | live with in-laws | 113 | 159     |                                                         |
| Lin,2019  | No                | 22  | 35      | Significant difference ( $\chi^2=49.675$ ,<br>P<0.001). |
|           | Yes               | 194 | 60      |                                                         |

***B17- Who influences fertility intention***

| Author | Group | SFI | Non-SFI | Results |
|--------|-------|-----|---------|---------|
|--------|-------|-----|---------|---------|

|                 |                |    |    |                                             |
|-----------------|----------------|----|----|---------------------------------------------|
| <b>Hua,2021</b> | Husband        | 22 | 9  | No significant difference ( $\chi^2$ test). |
|                 | Self           | 28 | 21 |                                             |
|                 | Parents        | 27 | 15 |                                             |
|                 | Parents in law | 24 | 18 |                                             |
|                 | Child          | 4  | 4  |                                             |

#### ***B18- Marital satisfaction***

| Author          | Group        | SFI | Non-SFI | Results                                     |
|-----------------|--------------|-----|---------|---------------------------------------------|
| <b>Lin,2019</b> | Satisfied    | 147 | 62      | No significant difference ( $\chi^2$ test). |
|                 | Not too bad  | 61  | 31      |                                             |
|                 | Dissatisfied | 7   | 3       |                                             |

#### ***B19- Number of children being raised***

| Author           | Group | SFI | Non-SFI | Results                                                  |
|------------------|-------|-----|---------|----------------------------------------------------------|
| <b>Yuan,2021</b> | 0     | 254 | 24      | Significant difference ( $\chi^2=330.931$ ,<br>P<0.001). |
|                  | 1     | 212 | 315     |                                                          |
|                  | 2     | 117 | 1       |                                                          |
| <b>Bai,2018</b>  | 0     | 184 | 127     | Significant difference (P<0.05).                         |
|                  | 1     | 273 | 264     |                                                          |

#### ***B20-Sex of children being raised***

| Author            | Group           | SFI | Non-SFI | Results                                                 |
|-------------------|-----------------|-----|---------|---------------------------------------------------------|
| <b>Yuan,2021</b>  | Male            | 150 | 160     | Significant difference ( $\chi^2=38.495$ ,<br>P<0.001). |
|                   | Male and female | 36  | 0       |                                                         |
|                   | Female          | 141 | 156     |                                                         |
| <b>Huang,2019</b> | Male            | 66  | 74      | No significant difference ( $\chi^2$ test).             |
|                   | Female          | 67  | 61      |                                                         |

#### ***B21- Age of first child***

| Author             | Group | SFI | Non-SFI | Results                                                 |
|--------------------|-------|-----|---------|---------------------------------------------------------|
| <b>Zhao,2019</b>   | <=2   | 404 | 458     | Significant difference ( $\chi^2=32.760$ ,<br>P<0.001). |
|                    | 2-3   | 190 | 594     |                                                         |
|                    | 3-7   | 130 | 186     |                                                         |
|                    | >7    | 466 | 664     |                                                         |
| <b>Hui,2019</b>    | 0-1   | 639 | 10050   | No significant difference ( $\chi^2$ test).             |
|                    | 1-2   | 150 | 2588    |                                                         |
|                    | 2-3   | 262 | 3640    |                                                         |
|                    | 3-4   | 224 | 3770    |                                                         |
|                    | >=4   | 1   | 28      |                                                         |
| <b>Wang T,2019</b> | <6    | 99  | 40      | Significant difference ( $\chi^2=118.20$ ,<br>P<0.001). |
|                    | 6-12  | 85  | 87      |                                                         |
|                    | >12   | 44  | 175     |                                                         |

#### ***B22- Gender of first child***

| Author    | Group  | SFI | Non-SFI | Results                                                 |
|-----------|--------|-----|---------|---------------------------------------------------------|
| Yuan,2020 | Male   | 102 | 187     | Significant difference ( $\chi^2=6.045$ ,<br>P<0.05).   |
|           | Female | 120 | 157     |                                                         |
| Zhao,2019 | Male   | 151 | 458     | Significant difference ( $\chi^2=4.42$ ,<br>P<0.05).    |
|           | Female | 194 | 229     |                                                         |
| Lin,2019  | Male   | 84  | 34      | Significant difference ( $\chi^2=29.163$ ,<br>P<0.001). |
|           | Female | 77  | 14      |                                                         |
| Qin,2018  | Male   | 19  | 88      | Significant difference ( $\chi^2=5.441$ ,<br>P<0.05).   |
|           | Female | 30  | 64      |                                                         |
| Tao,2021  | Male   | 568 | 380     | Significant difference (P<0.05).                        |
|           | Female | 246 | 105     |                                                         |
| Jin,2018  | Male   | 458 | 994     | No                                                      |
|           | Female | 420 | 699     |                                                         |

#### ***B23- The health condition of first child***

| Author   | Group       | SFI | Non-SFI | Results                                                 |
|----------|-------------|-----|---------|---------------------------------------------------------|
| Lin,2019 | Good        | 198 | 29      | Significant difference ( $\chi^2=31.731$ ,<br>P<0.001). |
|          | Not too bad | 16  | 5       |                                                         |
|          | Bad         | 0   | 1       |                                                         |
|          | Worst       | 1   | 1       |                                                         |

#### ***B24-The way of children care***

| Author   | Group             | SFI | Non-SFI | Results                                                  |
|----------|-------------------|-----|---------|----------------------------------------------------------|
| Hua,2021 | By myself         | 51  | 25      | Significant difference ( $\chi^2=115.729$ ,<br>P<0.001). |
|          | By parents        | 22  | 21      |                                                          |
|          | By nanny          | 25  | 13      |                                                          |
|          | Others            | 7   | 8       |                                                          |
| Lin,2019 | By myself         | 117 | 49      | Significant difference ( $\chi^2=30.173$ ,<br>P<0.001).  |
|          | By parents        | 73  | 26      |                                                          |
|          | By parents-in-law | 14  | 12      |                                                          |
|          | Others            | 11  | 9       |                                                          |

#### ***B25-The cost of raising children***

| Author   | Group       | SFI | Non-SFI | Results                                                |
|----------|-------------|-----|---------|--------------------------------------------------------|
| Hua,2021 | Highest     | 45  | 33      | Significant difference ( $\chi^2=27.788$ ,<br>P<0.01). |
|          | Higher      | 37  | 21      |                                                        |
|          | Not too low | 13  | 7       |                                                        |
|          | Lower       | 8   | 5       |                                                        |
|          | Lowest      | 2   | 1       |                                                        |



|         |             |    |    |                                                        |
|---------|-------------|----|----|--------------------------------------------------------|
| Ji,2019 | Highest     | 12 | 13 | Significant difference ( $\chi^2=15.941$ ,<br>P<0.01). |
|         | Higher      | 22 | 39 |                                                        |
|         | Not too low | 34 | 55 |                                                        |
|         | Lower       | 6  | 10 |                                                        |
|         | Lowest      | 12 | 76 |                                                        |

### ***B26-Babysitting fees***

| Author   | Group     | SFI | Non-SFI | Results                                        |
|----------|-----------|-----|---------|------------------------------------------------|
| Hui,2019 | 0-1999    | 1   | 7       | No significant difference ( $\chi^2$<br>test). |
|          | 2000-3999 | 6   | 78      |                                                |
|          | 4000-5999 | 16  | 172     |                                                |
|          | 6000-7999 | 17  | 135     |                                                |
|          | >7999     | 2   | 38      |                                                |

### ***B27- Childcare costs***

| Author   | Group     | SFI | Non-SFI | Results                                                |
|----------|-----------|-----|---------|--------------------------------------------------------|
| Hui,2019 | 0-1999    | 88  | 1536    | Significant difference<br>( $\chi^2=19.031$ , P<0.01). |
|          | 2000-3999 | 139 | 1965    |                                                        |
|          | 4000-5999 | 55  | 582     |                                                        |
|          | 6000-7999 | 11  | 77      |                                                        |
|          | 8000-9999 | 5   | 23      |                                                        |
|          | >9999     | 5   | 49      |                                                        |

### ***B28-Husband's time spent on housework and child care***

| Author    | Group | SFI | Non-SFI | Results                                              |
|-----------|-------|-----|---------|------------------------------------------------------|
| Zhao,2019 | <=1h  | 226 | 396     | Significant difference<br>( $\chi^2=9.01$ , P<0.01). |
|           | >1h   | 370 | 454     |                                                      |

### ***B29-Fertility attitudes of the first child***

| Author      | Group       | SFI | Non-SFI | Results                                                |
|-------------|-------------|-----|---------|--------------------------------------------------------|
| Wang T,2019 | Support     | 142 | 73      | Significant difference<br>( $\chi^2=94.43$ , P<0.001). |
|             | Non-support | 13  | 77      |                                                        |
|             | No idea     | 64  | 125     |                                                        |

### ***B30- Parents support***

| Author      | Group | SFI | Non-SFI | Results                                                |
|-------------|-------|-----|---------|--------------------------------------------------------|
| Wang T,2019 | Yes   | 84  | 67      | Significant difference<br>( $\chi^2=20.86$ , P<0.001). |
|             | No    | 144 | 235     |                                                        |
| Li,2017     | Yes   | 142 | 200     | Significant difference<br>( $\chi^2=6.277$ , P<0.05).  |
|             | No    | 28  | 73      |                                                        |
| Jin,2018    | Yes   | 618 | 795     | No                                                     |
|             | No    | 258 | 898     |                                                        |

### ***B31- To have second child pressure from parents***

| Author | Group | SFI | Non-SFI | Results |
|--------|-------|-----|---------|---------|
|--------|-------|-----|---------|---------|

|          |     |     |    |                                                |
|----------|-----|-----|----|------------------------------------------------|
| Lin,2019 | Yes | 49  | 18 | No significant difference<br>( $\chi^2$ test). |
|          | No  | 166 | 78 |                                                |

### ***B32- Parent's fertility attitude***

| Author      | Group       | SFI | Non-SFI | Results                                                   |
|-------------|-------------|-----|---------|-----------------------------------------------------------|
| Wang T,2019 | Support     | 184 | 109     | Significant difference<br>( $\chi^2=97.18$ , $P<0.001$ ). |
|             | Non-support | 6   | 39      |                                                           |
|             | No idea     | 29  | 122     |                                                           |

### ***B33- Parents' desired number of children***

| Author   | Group    | SFI | Non-SFI | Results |
|----------|----------|-----|---------|---------|
| Jin,2018 | $\leq 1$ | 30  | 469     | No      |
|          | $\geq 2$ | 782 | 1067    |         |
|          | No idea  | 65  | 156     |         |

### ***B34- Whether the first child's gender matches the parents' expectations***

| Author   | Group | SFI | Non-SFI | Results |
|----------|-------|-----|---------|---------|
| Jin,2018 | Yes   | 692 | 1463    | No      |
|          | No    | 185 | 229     |         |

### ***B35-In-laws' fertility attitude***

| Author      | Group       | SFI | Non-SFI | Results                                                   |
|-------------|-------------|-----|---------|-----------------------------------------------------------|
| Wang T,2019 | Support     | 170 | 91      | Significant difference<br>( $\chi^2=93.31$ , $P<0.001$ ). |
|             | Non-support | 2   | 29      |                                                           |
|             | No idea     | 46  | 141     |                                                           |

### ***B36-In-law relationships***

| Author  | Group       | SFI | Non-SFI | Results                                        |
|---------|-------------|-----|---------|------------------------------------------------|
| Li,2017 | Best        | 36  | 42      | No significant difference<br>( $\chi^2$ test). |
|         | Good        | 83  | 154     |                                                |
|         | Not too bad | 48  | 64      |                                                |
|         | Bad         | 3   | 11      |                                                |
|         | Worst       | 0   | 2       |                                                |

### ***B37-Envy of others people's second child***

| Author   | Group | SFI | Non-SFI | Results                                                  |
|----------|-------|-----|---------|----------------------------------------------------------|
| Lin,2019 | Yes   | 95  | 27      | Significant difference<br>( $\chi^2=7.181$ , $P<0.01$ ). |
|          | No    | 120 | 69      |                                                          |

### ***B38-Friend's fertility attitude***

| Author      | Group       | SFI | Non-SFI | Results                                                    |
|-------------|-------------|-----|---------|------------------------------------------------------------|
| Wang T,2019 | Support     | 120 | 20      | Significant difference<br>( $\chi^2=144.49$ , $P<0.001$ ). |
|             | Non-support | 6   | 26      |                                                            |
|             | No idea     | 81  | 216     |                                                            |

### ***C1- The attitude of women's companies***

| Author   | Group                | SFI | Non-SFI | Results                                                    |
|----------|----------------------|-----|---------|------------------------------------------------------------|
| Hua,2021 | Not supported at all | 15  | 11      | Significant difference<br>( $\chi^2=29.789$ , $P<0.001$ ). |
|          | Non-support          | 25  | 16      |                                                            |
|          | Not too supportive   | 26  | 16      |                                                            |
|          | Support              | 31  | 19      |                                                            |
|          | Fully support        | 8   | 5       |                                                            |
| Ji,2019  | Not supported at all | 2   | 13      | Significant difference<br>( $\chi^2=12.945$ , $P<0.05$ ).  |
|          | Non-support          | 6   | 18      |                                                            |
|          | Not too supportive   | 39  | 127     |                                                            |
|          | Support              | 17  | 20      |                                                            |
|          | Fully support        | 27  | 31      |                                                            |

| C2- Women's awareness of the universal two-child policy |                    |     |         |                                                            |
|---------------------------------------------------------|--------------------|-----|---------|------------------------------------------------------------|
| Author                                                  | Group              | SFI | Non-SFI | Results                                                    |
| Hua,2021                                                | Unknown            | 11  | 3       | Significant difference ( $\chi^2=40.883$ ,<br>$P<0.001$ ). |
|                                                         | Not too understand | 22  | 25      |                                                            |
|                                                         | Understand         | 49  | 25      |                                                            |
|                                                         | Fully understand   | 23  | 14      |                                                            |
| Ji,2019                                                 | Unknown            | 2   | 18      | No significant difference ( $\chi^2$ test).                |
|                                                         | Not too understand | 16  | 45      |                                                            |
|                                                         | Understand         | 51  | 104     |                                                            |
|                                                         | Fully understand   | 22  | 42      |                                                            |

| C3- Women's fertility intention before the implementation of the universal two-child policy |       |     |         |                                                          |
|---------------------------------------------------------------------------------------------|-------|-----|---------|----------------------------------------------------------|
| Author                                                                                      | Group | SFI | Non-SFI | Results                                                  |
| Hua,2021                                                                                    | No    | 47  | 42      | Significant difference ( $\chi^2=7.464$ ,<br>$P<0.05$ ). |
|                                                                                             | Yes   | 58  | 25      |                                                          |

| C4- The perfection of medical and pension insurance in public places |                  |     |         |                                                            |
|----------------------------------------------------------------------|------------------|-----|---------|------------------------------------------------------------|
| Author                                                               | Group            | SFI | Non-SFI | Results                                                    |
| Hua,2021                                                             | Imperfect        | 27  | 35      | Significant difference ( $\chi^2=26.546$ ,<br>$P<0.001$ ). |
|                                                                      | Not too complete | 18  | 29      |                                                            |
|                                                                      | Perfect          | 22  | 41      |                                                            |

| C5-The state of supervision of child care institutions |             |     |         |                                                          |
|--------------------------------------------------------|-------------|-----|---------|----------------------------------------------------------|
| Author                                                 | Group       | SFI | Non-SFI | Results                                                  |
| Ji,2019                                                | Unregulated | 12  | 39      | Significant difference ( $\chi^2=5.383$ ,<br>$P<0.05$ ). |
|                                                        | Regulated   | 79  | 79      |                                                          |

Table S6 Quality scores assessing risk of bias using a modified Newcastle-Ottawa scale

| Study type: Cross-sectional; Score: 1=achieved, 0=not achieved |                                  |             |                 |                               |                                                                                 |                           |                                 |             |
|----------------------------------------------------------------|----------------------------------|-------------|-----------------|-------------------------------|---------------------------------------------------------------------------------|---------------------------|---------------------------------|-------------|
| Authors                                                        | Representativeness of the sample | Sample size | Non-respondents | Ascertainment of the exposure | Comparability of subjects in different outcome groups (control for confounding) | Assessment of the outcome | Statistical test is appropriate | Total score |
| 213Yuan,2021                                                   | 1                                | 1           | 0               | 1                             | 1                                                                               | 1                         | 1                               | 6           |
| 186Hua,2021                                                    | 1                                | 0           | 0               | 1                             | 1                                                                               | 1                         | 1                               | 5           |
| 177Fan,2021                                                    | 0                                | 0           | 0               | 1                             | 1                                                                               | 1                         | 1                               | 4           |
| 162Yang,2020                                                   | 0                                | 0           | 0               | 1                             | 0                                                                               | 1                         | 0                               | 2           |
| 144 Yuan,2020                                                  | 1                                | 1           | 0               | 1                             | 1                                                                               | 1                         | 1                               | 6           |
| 137Ji,2019                                                     | 1                                | 0           | 0               | 1                             | 0                                                                               | 1                         | 1                               | 4           |
| 134Huang,2019                                                  | 1                                | 0           | 0               | 1                             | 1                                                                               | 1                         | 0                               | 4           |
| 132Zhao,2019                                                   | 1                                | 1           | 0               | 1                             | 1                                                                               | 1                         | 1                               | 6           |
| 128Lin,2019                                                    | 0                                | 0           | 0               | 1                             | 1                                                                               | 1                         | 1                               | 4           |
| 121Hui,2019                                                    | 1                                | 1           | 0               | 1                             | 1                                                                               | 1                         | 1                               | 6           |
| 109Li,2017                                                     | 1                                | 0           | 0               | 1                             | 1                                                                               | 1                         | 1                               | 5           |
| 95Liang,2019                                                   | 1                                | 1           | 0               | 1                             | 1                                                                               | 1                         | 1                               | 6           |
| 87Qin,2018                                                     | 0                                | 0           | 0               | 1                             | 1                                                                               | 1                         | 1                               | 4           |
| 83Jin,2018                                                     | 1                                | 1           | 0               | 1                             | 1                                                                               | 1                         | 0                               | 5           |
| 62Tao,2021                                                     | 1                                | 1           | 0               | 1                             | 0                                                                               | 1                         | 1                               | 5           |
| 21Bai,2018                                                     | 0                                | 1           | 0               | 1                             | 0                                                                               | 1                         | 1                               | 4           |
| 4Wang T,2019                                                   | 1                                | 0           | 0               | 1                             | 1                                                                               | 1                         | 1                               | 5           |

**Table S7 Meta-analyses on 18 factors**

| Exposure                 | No. of studies in<br>Meta-analyses | Comparison model                                       | Q test         |          | Statistical<br>model | Pooled OR            | Z test   | Egger |  |
|--------------------------|------------------------------------|--------------------------------------------------------|----------------|----------|----------------------|----------------------|----------|-------|--|
|                          |                                    |                                                        | I <sup>2</sup> | P-value  |                      | OR (95%CI)           | P-value  | P> t  |  |
| Individual level         |                                    |                                                        |                |          |                      |                      |          |       |  |
| Demographic factors      |                                    |                                                        |                |          |                      |                      |          |       |  |
| Age                      | 9                                  | Younger(<=35 years old) vs.<br>Older(>35 years old)    | 89%            | <0.00001 | Random-effect        | 2.90<br>[2.12,3.96]  | <0.00001 | 0.313 |  |
| Education                | 8                                  | High school and below vs.<br>Junior college or above   | 39%            | 0.12     | Fixed-effect         | 0.68<br>[0.62,0.75]  | <0.00001 | 0.456 |  |
| Hukou                    | 3                                  | Rural vs. Urban                                        | 85%            | 0.001    | Random-effect        | 1.55<br>[0.79,3.05]  | 0.20     | 0.566 |  |
| Income                   | 3                                  | Low-income(<=8000 yuan) vs.<br>High-income(>8000 yuan) | 65%            | 0.06     | Random-effect        | 0.68<br>[0.46,0.99]  | 0.04     | 0.803 |  |
| Marital status           | 3                                  | Unmarried vs. Married                                  | 98%            | <0.00001 | Random-effect        | 1.37<br>[0.12,16.04] | 0.80     | 0.231 |  |
| Work stability           | 4                                  | High vs. Low                                           | 0%             | 0.41     | Fixed-effect         | 1.33<br>[1.06,1.66]  | 0.01     | 0.528 |  |
| Fertility attitude       |                                    |                                                        |                |          |                      |                      |          |       |  |
| Ideal number of children | 3                                  | <=1 vs. >1                                             | 91%            | <0.00001 | Random-effect        | 0.04<br>[0.01,0.18]  | <0.0001  | 0.171 |  |
| Gender preference        | 3                                  | Yes vs. No                                             | 92%            | <0.00001 | Random-effect        | 1.20<br>[0.51,2.81]  | 0.67     | 0.502 |  |
| Family level             |                                    |                                                        |                |          |                      |                      |          |       |  |
| Husband factors          |                                    |                                                        |                |          |                      |                      |          |       |  |

|                                                     |   |                                                                         |     |          |               |                     |          |       |
|-----------------------------------------------------|---|-------------------------------------------------------------------------|-----|----------|---------------|---------------------|----------|-------|
| Husband's education                                 | 5 | High school and below vs.<br>Junior college or above                    | 17% | 0.30     | Fixed-effect  | 0.68<br>[0.60,0.77] | <0.00001 | 0.210 |
| The husband has a local hukou                       | 3 | Yes vs. No                                                              | 0%  | 0.58     | Fixed-effect  | 0.55<br>[0.48,0.64] | <0.00001 | 0.403 |
| Whether the couple comes from only one-child family | 3 | Yes vs. No                                                              | 30% | 0.24     | Fixed-effect  | 0.76<br>[0.62,0.93] | 0.008    | 0.683 |
| Annual household income                             | 3 | Low(<200000 yuan) vs.<br>High(>=200000 yuan)                            | 82% | 0.003    | Random-effect | 0.52<br>[0.34,0.80] | 0.003    | 0.450 |
| Family financial self-assessment                    | 3 | Low-level vs. High-level                                                | 90% | <0.00001 | Random-effect | 0.89<br>[0.54,1.46] | 0.63     | 0.744 |
| House property                                      | 3 | Yes vs. No                                                              | 44% | 0.17     | Fixed-effect  | 1.27<br>[0.81,1.96] | 0.29     | 0.846 |
| Live together with parents                          | 3 | Yes vs. No                                                              | 97% | <0.00001 | Random-effect | 0.69<br>[0.29,1.63] | 0.39     | 0.632 |
| <b>Children factors</b>                             |   |                                                                         |     |          |               |                     |          |       |
| Age of first child                                  | 3 | Before kindergarten(<=3 years old) vs. After kindergarten(>3 years old) | 93% | <0.00001 | Random-effect | 1.32<br>[0.83,2.10] | 0.25     | 0.334 |
| Gender of first child                               | 6 | Male vs. Female                                                         | 76% | 0.001    | Random-effect | 0.58<br>[0.44,0.75] | <0.0001  | 0.310 |
| <b>Parents or others factors</b>                    |   |                                                                         |     |          |               |                     |          |       |
| Parents support                                     | 4 | Yes vs. No                                                              | 79% | 0.002    | Random-effect | 1.88<br>[1.26,2.80] | 0.002    | 0.113 |

**Table S8 Factors not included in the meta-analysis and whether they were significantly associated with SFI**

| <b>Group</b>            | <b>Category</b>            | <b>Factors</b>                                          | <b>Authors</b> | <b>Result</b>                                           |
|-------------------------|----------------------------|---------------------------------------------------------|----------------|---------------------------------------------------------|
| <b>Individual level</b> | <b>Demographic factors</b> | A7- Hold a management position                          | Hua,2021       | No significant difference ( $\chi^2$ test).             |
|                         |                            | A8-Job title                                            | Yuan,2020      | No significant difference ( $\chi^2$ test).             |
|                         |                            | A9- Nationality                                         | Huang,2019     | No significant difference ( $\chi^2$ test).             |
|                         |                            | A10-Whether comes from only one child family            | Jin,2018       | No                                                      |
|                         |                            |                                                         | Lin,2019       | Significant difference ( $\chi^2=9.158$ , $P<0.01$ ).   |
|                         |                            | A11- Physical health                                    | Fan,2021       | Significant difference ( $\chi^2=10.851$ , $P<0.05$ ).  |
|                         |                            |                                                         | Lin,2019       | No significant difference ( $\chi^2$ test).             |
|                         |                            | A12- Frequency of participation in community activities | Zhao,2019      | Significant difference ( $\chi^2=22.78$ , $P<0.001$ ).  |
|                         |                            | A13- Employed                                           | Jin,2018       | No                                                      |
|                         |                            | A14- Work pressure                                      | Li,2017        | Significant difference ( $\chi^2=3.177^a$ , $P<0.01$ ). |
|                         | <b>Fertility attitude</b>  | A15- Ideal childbearing age                             | Lin,2019       | Significant difference ( $\chi^2=12.584$ , $P<0.01$ )   |

|              |                 |                                                              |                         |                                                                                                                        |
|--------------|-----------------|--------------------------------------------------------------|-------------------------|------------------------------------------------------------------------------------------------------------------------|
|              |                 | A18- Age at the first child birthed                          | Yuan,2020               | Significant difference ( $\chi^2=15.427$ , $P<0.01$ ).                                                                 |
|              |                 | A19- Expected sex of first child                             | Hua,2021                | No significant difference ( $\chi^2$ test).                                                                            |
|              |                 | A20- Expected sex of two children                            | Hua,2021                | No significant difference ( $\chi^2$ test).                                                                            |
|              |                 | A21- The impact of childbirth on women's careers             | Hua,2021<br>Fan,2021    | No significant difference ( $\chi^2$ test).<br>Significant difference ( $\chi^2=24.472$ , $P<0.001$ ).                 |
|              |                 | A22- Facing conflicting choices between career and fertility | Hua,2021<br><br>Ji,2019 | Significant difference ( $\chi^2=37.718$ , $P<0.001$ ).<br><br>Significant difference ( $\chi^2=27.392$ , $P<0.001$ ). |
| Family level | Husband factors | B1-Husband's age                                             | Qin,2018<br>Wang T,2019 | No significant difference ( $\chi^2$ test).<br>Significant difference ( $\chi^2=74.66$ , $P<0.001$ ).                  |
|              |                 | B3- Husband's hukou                                          | Li,2017                 | Significant difference ( $\chi^2=4.613$ , $P<0.05$ ).                                                                  |
|              |                 | B5- Husband's occupation                                     | Hui,2019<br>Qin,2018    | No significant difference ( $\chi^2$ test).<br>No significant difference ( $\chi^2$ test).                             |
|              |                 | B6- Husband's job stability                                  | Hui,2019                | No significant difference ( $\chi^2$ test).                                                                            |
|              |                 |                                                              |                         |                                                                                                                        |



|                         |                                                |                      |                                                          |
|-------------------------|------------------------------------------------|----------------------|----------------------------------------------------------|
|                         | B7- Husband's income                           | Qin,2018             | Significant difference ( $\chi^2=12.641$ , $P<0.01$ ).   |
|                         | B8-Whether husband from only one child family  | Qin,2018<br>Jin,2018 | No significant difference ( $\chi^2$ test).<br>No        |
|                         | B9- Fertility attitude of husband              | Wang T,2019          | Significant difference ( $\chi^2=175.77$ , $P<0.001$ ).  |
|                         | B10- Husband's desired number of children      | Jin,2018             | No                                                       |
|                         | B11- Household registration type of the couple | Tao,2021             | Significant difference ( $P<0.05$ ).                     |
|                         | B17- Who influences fertility intention        | Hua,2021             | No significant difference ( $\chi^2$ test).              |
|                         | B18-Marital satisfaction                       | Lin,2019             | No significant difference ( $\chi^2$ test).              |
| <b>Children factors</b> | B19-Number of children being raised            | Yuan,2020            | Significant difference ( $\chi^2=330.931$ , $P<0.001$ ). |
|                         |                                                | Bai,2018             | Significant difference ( $P<0.05$ ).                     |
|                         | B20- Sex of children being raised              | Yuan,2021            | Significant difference ( $\chi^2=38.495$ , $P<0.001$ ).  |
|                         |                                                | Huang,2019           | No significant difference ( $\chi^2$ test).              |
|                         | B23-The health condition of first child        | Lin,2019             | Significant difference ( $\chi^2=31.731$ , $P<0.001$ ).  |

|                                  |                                                                        |             |                                                          |
|----------------------------------|------------------------------------------------------------------------|-------------|----------------------------------------------------------|
| <b>Parents or others factors</b> | B24-The way of children care                                           | Hua,2021    | Significant difference ( $\chi^2=115.729$ , $P<0.001$ ). |
|                                  |                                                                        | Lin,2019    | Significant difference ( $\chi^2=30.173$ , $P<0.001$ ).  |
|                                  | B25-The cost of raising children                                       | Hua,2021    | Significant difference ( $\chi^2=27.788$ , $P<0.01$ ).   |
|                                  |                                                                        | Ji,2019     | Significant difference ( $\chi^2=15.941$ , $P<0.01$ ).   |
|                                  | B26- Babysitting fees                                                  | Hui,2019    | No significant difference ( $\chi^2$ test).              |
|                                  | B27-Childcare costs                                                    | Hui,2019    | Significant difference ( $\chi^2=19.031$ , $P<0.01$ ).   |
|                                  | B28-Husband's time spent on housework and child care                   | Zhao,2019   | Significant difference ( $\chi^2=9.01$ , $P<0.01$ ).     |
|                                  | B29-Fertility attitudes of the first child                             | Wang T,2019 | Significant difference ( $\chi^2=94.43$ , $P<0.001$ ).   |
|                                  | B31-To have second child pressure from parents                         | Lin,2019    | No significant difference ( $\chi^2$ test).              |
|                                  | B32-Parent's fertility attitude                                        | Wang T,2019 | Significant difference ( $\chi^2=97.18$ , $P<0.001$ ).   |
|                                  | B33-Parents' desired number of children                                | Jin,2018    | No                                                       |
|                                  | B34-Whether the first child's gender matches the parents' expectations | Jin,2018    | No                                                       |

|                     |                       |                                                                                            |             |                                                         |
|---------------------|-----------------------|--------------------------------------------------------------------------------------------|-------------|---------------------------------------------------------|
| <b>Social level</b> | <b>Policy factors</b> | B35-In-laws' fertility attitude                                                            | Wang T,2019 | Significant difference ( $\chi^2=93.31$ , $P<0.001$ ).  |
|                     |                       | B36- In-law relationships                                                                  | Li,2017     | No significant difference ( $\chi^2$ test).             |
|                     |                       | B37-Envy of other people's second child                                                    | Lin,2019    | Significant difference ( $\chi^2=7.181$ , $P<0.01$ ).   |
|                     |                       | B38-Friend's fertility attitude                                                            | Wang T,2019 | Significant difference ( $\chi^2=144.49$ , $P<0.001$ ). |
|                     | <b>Public service</b> | C1-The attitude of women's companies                                                       | Hua,2021    | Significant difference ( $\chi^2=29.789$ , $P<0.001$ ). |
|                     |                       |                                                                                            | Ji,2019     | Significant difference ( $\chi^2=12.945$ , $P<0.05$ ).  |
|                     |                       | C2-Women's awareness of the universal two-child policy                                     | Hua,2021    | Significant difference ( $\chi^2=40.883$ , $P<0.001$ ). |
|                     |                       |                                                                                            | Ji,2019     | No significant difference ( $\chi^2$ test).             |
|                     |                       | C3-Women's fertility intention before the implementation of the universal two-child policy | Hua,2021    | Significant difference ( $\chi^2=7.464$ , $P<0.05$ ).   |
|                     |                       | C4- The perfection of medical and pension insurance in public places                       | Hua,2021    | Significant difference ( $\chi^2=26.546$ , $P<0.001$ ). |
|                     |                       | C5- The state of supervision of child care institutions                                    | Ji,2019     | Significant difference ( $\chi^2=5.383$ , $P<0.05$ ).   |
